# Supplementary material for: KAT6A regulates stemness of aging bone marrow-derived mesenchymal stem cells through Nrf2/ARE signaling pathway
Source: PubMed Central journal article supplement (PMC7860225; doi:10.1186/s13287-021-02164-5), 2021-02-04

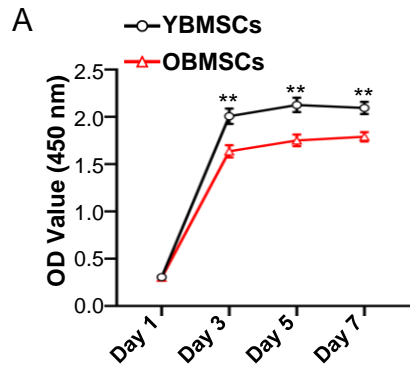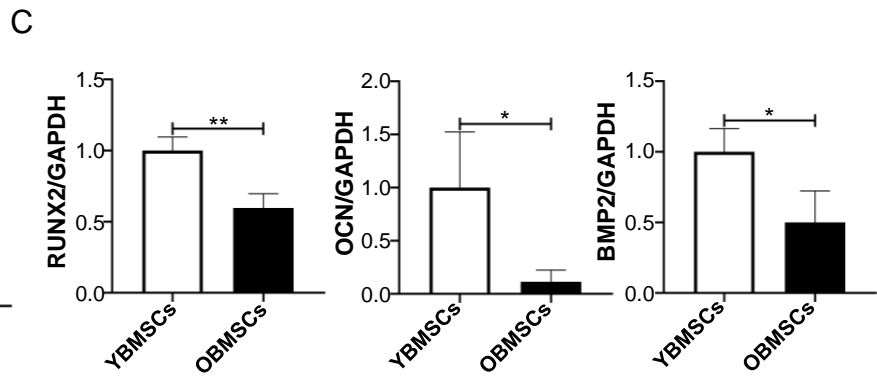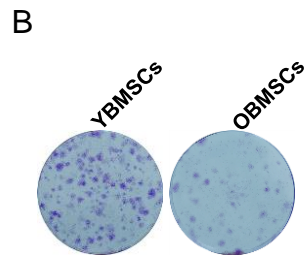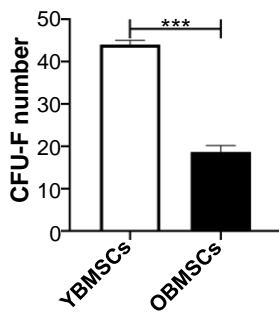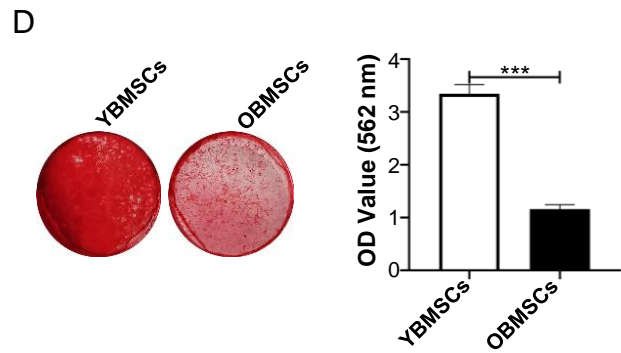

Supplement: 13287_2021_2164_MOESM2_ESM.pdf [file 13287_2021_2164_MOESM2_ESM.pdf]
